# Supplementary material for: Diamagnetic repulsion of particles for multilaminar flow assays
Source: Royal Society of Chemistry journal article supplement (doi:10.1039/c5ra21867e), 2015-01-01
Supplement: c5ra21867e1.pdf [file c5ra21867e1.pdf]

## Electronic Supplementary Information (ESI)

### Diamagnetic repulsion of particles for multilaminar flow assays

Mark D. Tarn, Luke T. Elders, Sally A. Peyman<sup>‡</sup> and Nicole Pamme\*

*Department of Chemistry, University of Hull, Cottingham Road, Hull, HU6 7RX, UK.*

\* Corresponding author. *E-mail: n.pamme@hull.ac.uk; Tel: +44 (0) 1482 465027; Fax: +44 (0) 466410*

<sup>‡</sup> Current address: *School of Physics and Astronomy, University of Leeds, Woodhouse Lane, Leeds, LS2 9JT, UK*

#### Contents

1. Fluorescently labelled biotin in ferrofluid (**Fig. S1**) *Page S2*
2. Laminar flow in the microfluidic device (**Fig. S2**) *Page S3*
3. Finite Element Method Magnetics (FEMM) simulations (**Fig. S3**) *Page S4*
4. Concept of multilaminar flow reactions via diamagnetic repulsion (**Fig. S4**) *Page S5*

## 1. Fluorescently labelled biotin in ferrofluid

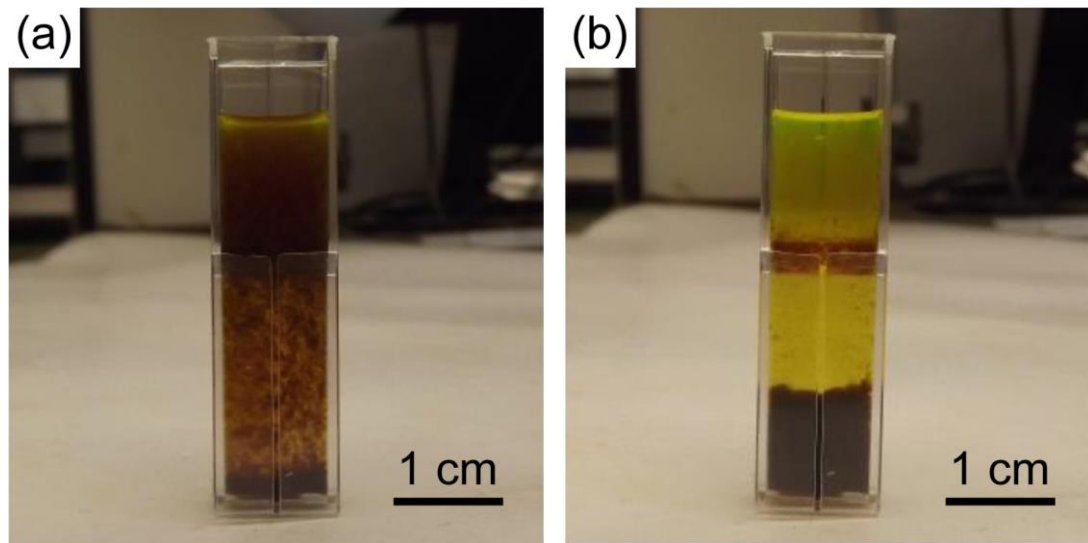

**Fig. S1** Addition of biotin-4-fluorescein solution to 0.01x diluted aqueous-based EMG 507 ferrofluid. (a) Immediately following addition, showing agglomeration of the magnetic nanoparticles in the solution. (b) Several minutes after addition, with the magnetic nanoparticle agglomerates having dropped out of suspension, leaving the fluorescently labelled biotin solution clearly visible.

## 2. Laminar flow in the microfluidic device

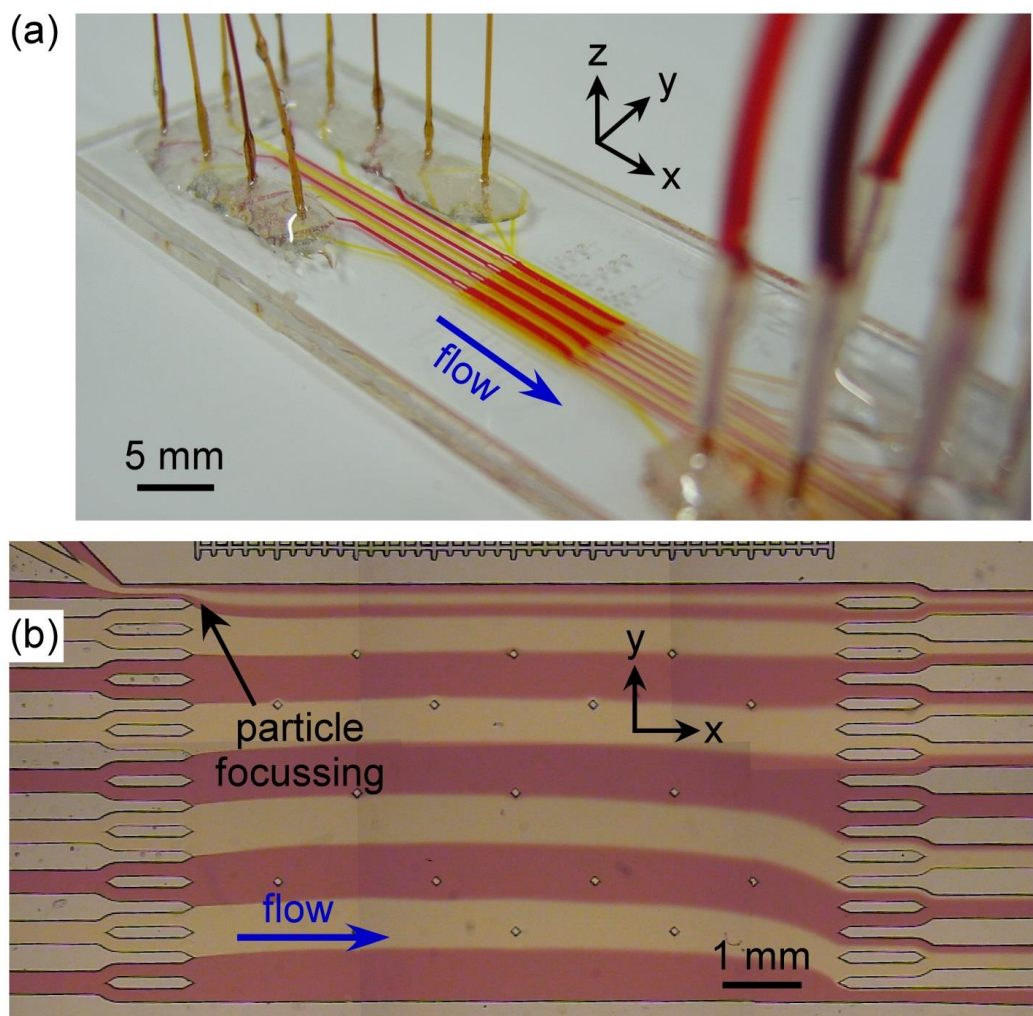

**Fig. S2** Laminar flow regime in the 10-inlet microfluidic chip, visualised with red and yellow inks. (a) Photograph of the device with inlet and outlet tubing. (b) Superimposed images of the reaction chamber with laminar flow of red and yellow inks, taken with a 10x objective on a microscope. Although the flow near the bottom of the chamber is diverted downwards slightly due to a region of low pressure caused by a short outlet channel, the region at the top of the chamber through which the particles passed did not experience this effect.

### 3. Finite Element Method Magnetics (FEMM) simulations

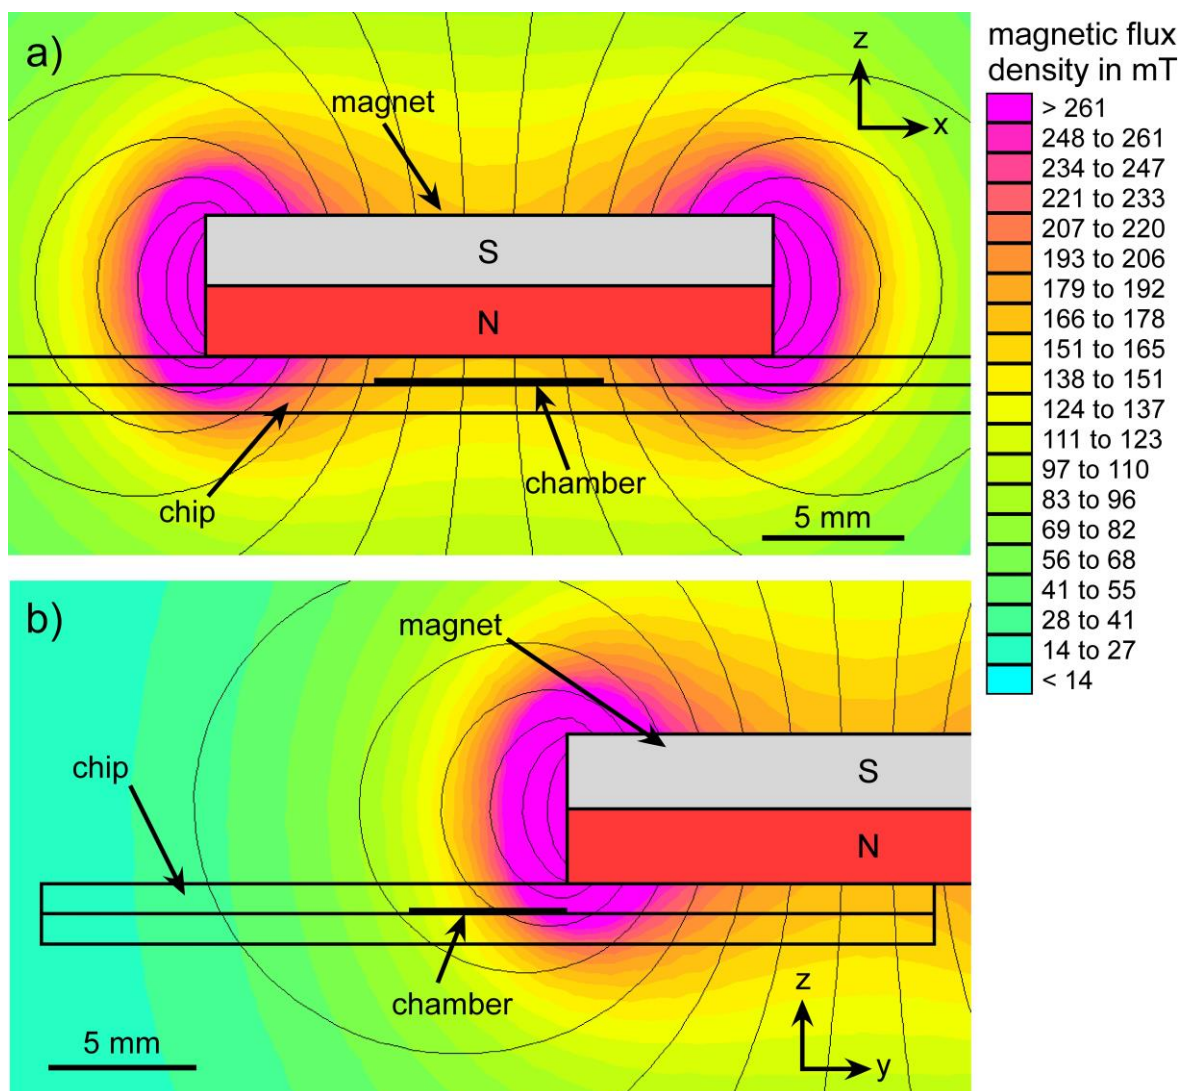

**Fig. S3** FEMM simulations of the magnetic field across the chip from a 20 mm  $\varnothing$  x 5 mm NdFeB magnet. (a) Front view of the device. (b) Side-on view of the chip. Due to software limitations, a view could not be achieved from above the microfluidic chip. The cylindrical shape of the magnet could also not be taken into account, thus the simulations show a cross-section of the centre of the magnet and the chip/chamber in relation to this. The magnetic flux density ( $\mathbf{B}$ ) at the surface of the magnet was calculated to be approximately 275 mT, and the FEMM simulations were plotted from this. From the simulation, the average value of  $\mathbf{B}$  in the region of the chamber through which the particles passed was estimated to be 307 mT, with a gradient ( $\nabla\mathbf{B}$ ) of 48 mT mm $^{-1}$  and a  $(\mathbf{B}\cdot\nabla)\mathbf{B}$  value of 14.7 T $^2$  m $^{-1}$ .

#### 4. Concept of multilaminar flow reactions via diamagnetic repulsion

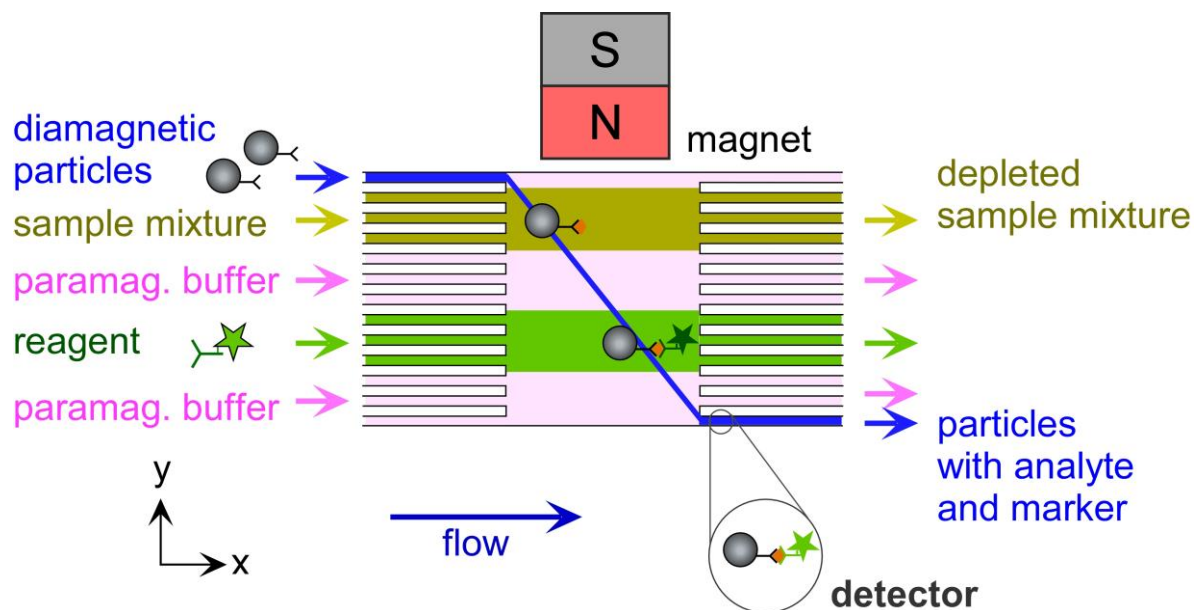

**Fig. S4** Schematic showing a future concept of two-step multilaminar flow assays via diamagnetic repulsion of functionalised polymer particles, e.g. for sandwich immunoassays.
